# Supplementary material for: Use of a community advisory board to build equitable algorithms for participation in clinical trials: a protocol paper for HoPeNET
Source: HighWire-hosted journal article supplement (doi:10.1136/bmjhci-2021-100453), 2022-02-01
Supplement: bmjhci-2021-100453supp001_data_supplement.pdf [file bmjhci-2021-100453supp001_data_supplement.pdf]

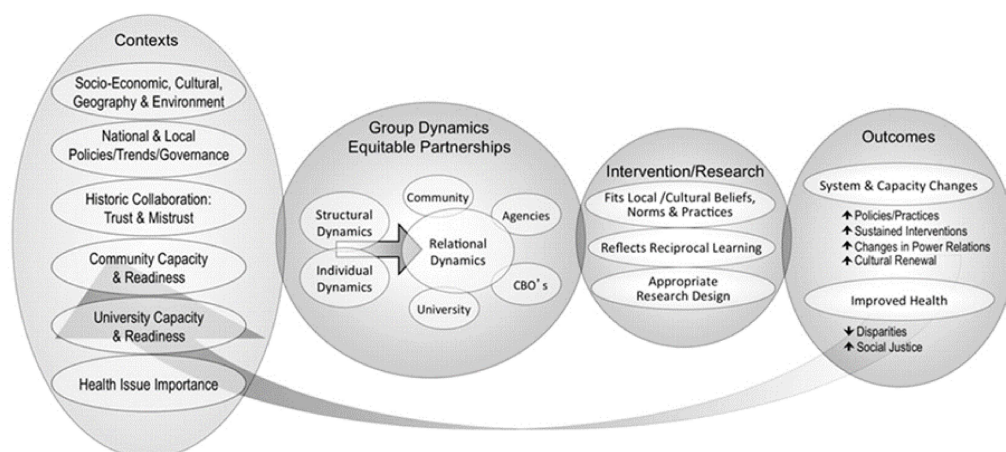

| Contexts                                                                                                                                                                                                                                                                                                                                                                                                                                                                      | Group Dynamics                                                                                                                                                                                                                                                                                                                                                                                                                                                                                                                                                                                                                                |                                                                                                                                                                                                                                                                                                                                                                                                                                                                     | Intervention/ Research Design                                                                                                                                                                                                                                                                                                                                                              | Outcomes                                                                                                                                                                                                                                                                                                                                                                                                                                                                                                                                                                                                                                                                                            |
|-------------------------------------------------------------------------------------------------------------------------------------------------------------------------------------------------------------------------------------------------------------------------------------------------------------------------------------------------------------------------------------------------------------------------------------------------------------------------------|-----------------------------------------------------------------------------------------------------------------------------------------------------------------------------------------------------------------------------------------------------------------------------------------------------------------------------------------------------------------------------------------------------------------------------------------------------------------------------------------------------------------------------------------------------------------------------------------------------------------------------------------------|---------------------------------------------------------------------------------------------------------------------------------------------------------------------------------------------------------------------------------------------------------------------------------------------------------------------------------------------------------------------------------------------------------------------------------------------------------------------|--------------------------------------------------------------------------------------------------------------------------------------------------------------------------------------------------------------------------------------------------------------------------------------------------------------------------------------------------------------------------------------------|-----------------------------------------------------------------------------------------------------------------------------------------------------------------------------------------------------------------------------------------------------------------------------------------------------------------------------------------------------------------------------------------------------------------------------------------------------------------------------------------------------------------------------------------------------------------------------------------------------------------------------------------------------------------------------------------------------|
| <ul style="list-style-type: none"> <li>-Social-economic, cultural, geographic, political-historical, environmental factors</li> <li>-Policies/Trends: National/local governance &amp; political climate</li> <li>-Historic degree of collaboration and trust between university &amp; community</li> <li>-Community: capacity, readiness &amp; experience</li> <li>-University: capacity, readiness &amp; reputation</li> <li>-Perceived severity of health issues</li> </ul> | <p><u>Structural Dynamics:</u></p> <ul style="list-style-type: none"> <li>• Diversity</li> <li>• Complexity</li> <li>• Formal Agreements</li> <li>• Real power/resource sharing</li> <li>• Alignment with CBPR principles</li> <li>• Length of time in partnership</li> </ul> <p><u>Individual Dynamics:</u></p> <ul style="list-style-type: none"> <li>• Core values</li> <li>• Motivations for participating</li> <li>• Personal relationships</li> <li>• Cultural identities/humility</li> <li>• Bridge people on research team</li> <li>• Individual beliefs, spirituality &amp; meaning</li> <li>• Community reputation of PI</li> </ul> | <p><u>Relational Dynamics:</u></p> <ul style="list-style-type: none"> <li>• Safety</li> <li>• Dialogue, listening &amp; mutual learning</li> <li>• Leadership &amp; stewardship</li> <li>• Influence &amp; power dynamics</li> <li>• Flexibility</li> <li>• Self &amp; collective reflection</li> <li>• Participatory decision-making &amp; negotiation</li> <li>• Integration of local beliefs to group process</li> <li>• Task roles and communication</li> </ul> | <ul style="list-style-type: none"> <li>-Intervention adapted or created within local culture</li> <li>-Intervention informed by local settings and organizations</li> <li>-Shared learning between academic and community knowledge</li> <li>-Research and evaluation design reflects partnership input</li> <li>-Bidirectional translation, implementation &amp; dissemination</li> </ul> | <p><u>CBPR System &amp; Capacity Changes:</u></p> <ul style="list-style-type: none"> <li>• Changes in policies /practices</li> <li>-In universities and communities</li> <li>• Culturally-based &amp; sustainable interventions</li> <li>• Changes in power relations</li> <li>• Empowerment:                             <ul style="list-style-type: none"> <li>-Community voices heard</li> <li>-Capacities of advisory councils</li> <li>-Critical thinking</li> </ul> </li> <li>• Cultural revitalization &amp; renewal</li> </ul> <p><u>Health Outcomes:</u></p> <ul style="list-style-type: none"> <li>• Transformed social /econ conditions</li> <li>• Reduced health disparities</li> </ul> |
